# Supplementary material for: Association of Selenoprotein and Selenium Pathway Genotypes with Risk of Colorectal Cancer and Interaction with Selenium Status
Source: MDPI journal article supplement (doi:10.3390/nu11040935), 2019-04-25
Supplement: s1 [file s1]

## **ASSOCIATION OF SELENOPROTEIN AND SELENIUM PATHWAY GENOTYPES WITH RISK OF COLORECTAL CANCER AND INTERACTION WITH SELENIUM STATUS**

### ***AUTHORS***

VERONIKA FEDIRKO<sup>1</sup>, MAZDA JENAB<sup>2</sup>, CATHERINE MÉPLAN<sup>3</sup>, JEB S. JONES<sup>1</sup>,  
WANZHE ZHU<sup>1</sup>, LUTZ SCHOMBURG<sup>4</sup>, AFSHAN SIDDIQ<sup>5</sup>, SANDRA HYBSIER<sup>4</sup>, KIM  
OVERVAD<sup>6</sup>, ANNE TJØNNELAND<sup>7</sup>, HANANE OMICHESSAN<sup>8,9</sup>, VITTORIO  
PERDUCA<sup>8,9,10</sup>, MARIE-CHRISTINE BOUTRON-RUAULT<sup>8,9</sup>, TILMAN KÜHN<sup>11</sup>,  
VERENA KATZKE<sup>11</sup>, KRASIMIRA ALEKSANDROVA<sup>12</sup>, ANTONIA TRICHOPOULOU<sup>13</sup>,  
ANNA KARAKATSANI<sup>13,14</sup>, ANASTASIA KOTANIDOU<sup>13,15</sup>, ROSARIO TUMINO<sup>16</sup>,  
SALVATORE PANICO<sup>17</sup>, GIOVANNA MASALA<sup>18</sup>, CLAUDIA AGNOLI<sup>19</sup>, ALESSIO  
NACCARATI<sup>20</sup>, BAS BUENO-DE-MESQUITA<sup>21,22,23,24</sup>, ROEL C.H. VERMEULEN<sup>25</sup>,  
ELISABETE WEIDERPASS<sup>26,27,28,29</sup>, GURI SKEIE<sup>29</sup>, THERESE HAUGDAHL NØST<sup>29</sup>,  
LEILA LUJAN-BARROSO<sup>30</sup>, J. RAMÓN QUIRÓS<sup>31</sup>, JOSÉ MARÍA HUERTA<sup>32,33</sup>,  
MIGUEL RODRÍGUEZ-BARRANCO<sup>33,34</sup>, AURELIO BARRICARTE<sup>33,35,36</sup>, BJÖRN  
GYLLING<sup>37</sup>, SOPHIA HARLID<sup>38</sup>, KATHRYN E. BRADBURY<sup>39</sup>, NICK WAREHAM<sup>40</sup>,  
KAY-TEE KHAW<sup>41</sup>, MARC GUNTER<sup>2</sup>, NEIL MURPHY<sup>2</sup>, HEINZ FREISLING<sup>2</sup>, KOSTAS  
TSILIDIS<sup>5,42</sup>, DAGFINN AUNE<sup>5</sup>, ELIO RIBOLI<sup>5</sup>, JOHN E. HESKETH<sup>3</sup>, DAVID J.  
HUGHES<sup>43</sup>

## Supplementary Figure S1: Selenium pathway genetic analysis flowchart

1040 tagging SNPs successfully analysed (of 1264) in 154 Selenium (Se) Pathway genes (< 20% missing data) in 1420 colorectal (CRC) cases and 1421 controls

Multivariable unconditional logistic regression

144 SNPs in 63 genes associated with an altered CRC risk ( $P < 0.05$ )\*  
(\*note before multiple testing corrections)

21 SNPs in 12 of 24 selenoprotein genes (Pathway 1)

19 SNPs in 8 of 17 other Se transport / biosynthesis genes (Pathway 1)

104 SNPs in 43 of 113 wider Se interaction genes (Pathways 2-8)

Similar range of risk associations by sex and colon / rectum sub-site

Significant after multiple testing by Benjamini-Hochberg ( $P_{BH} < 0.05$ ) and P-values adjusted for correlated tests ( $P_{ACT} < 0.1$ )

Only **TXNRD1** (rs11111979) in Selenoprotein Genes (borderline;  $P_{ACT} = 0.1$ )

Wider Pathway: SNPs in **SMAD3**, **SMAD7**, **C-MYC** (as found by CRC-GWAS), and also: **BAX**, **BMP2**, **FRZB**
